# Supplementary material for: Intranasally Administered Exosomes from Umbilical Cord Stem Cells Have Preventive Neuroprotective Effects and Contribute to Functional Recovery after Perinatal Brain Injury
Source: MDPI journal article supplement (doi:10.3390/cells8080855), 2019-08-08
Supplement: s1 [file s1]

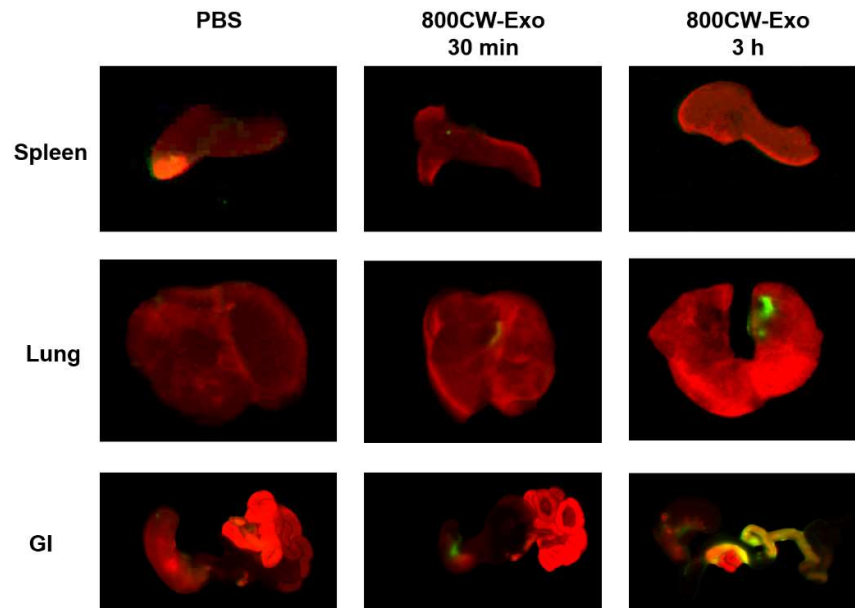

**Figure S1.** Ectopic accumulation of exosomes after intranasal administration of mesenchymal stromal cell-derived exosomes. Representative images of the spleen, the lung and the gastro-intestinal tract (GI) from rats with PBI 30 minutes and 3 hours after intranasal administration of either PBS or IRDye® 800CW-labeled exosomes (green) in PBS. Background tissue autofluorescence is depicted in red.
